# Supplementary material
Source: PubMed Central journal article supplement (PMC3957605)
Supplement: AEM.03281-13_zam999105186so1.pdf [file AEM.03281-13_zam999105186so1.pdf]

1           **Distribution, diversity and activities of sulfur dioxygenases in**

2                                   **heterotrophic bacteria**

3                                   Honglei Liu, Yufeng Xin, and Luying Xun

4

5   Supplementary Information Contents

6

7   1- Supplementary Table

8   Table S1

9

10  2- Supplementary Figures

11  Fig.S1

12  Fig.S2

13 **Table S1 Oligonucleotide primers used for plasmid construction**

| Primers    | Nucleotide Sequence <sup>a</sup>                 | Target protein |
|------------|--------------------------------------------------|----------------|
| AtBlh-f    | <u>TAAGAAGGAGATATACAT</u> ATGAAGGCCGTAAGG        | AtBlh          |
| AtBlh-r    | TGGTGGTGGTGCCTCGAGCCATGTGCTGCCCTCCAGCA           |                |
| SmBlh-f    | <u>AGAAGGAGATATACAT</u> ATGCCTATTACTGCAATATCC    | SmBlh          |
| SmBlh-r    | GTGGTGGTGCCTCGAGTTCCCATGCCGCTCCCTG               |                |
| CnSdoA-f   | <u>TAAGAAGGAGATATACAT</u> ATGACACCGACCATGCCAAGCC | CnSdoA         |
| CnSdoA-r   | GTGGTGGTGCCTCGAGGAGGGCGTTGAGGGGAATCT             |                |
| BxSdoA-f   | <u>TAAGAAGGAGATATACAT</u> ATGACCGCC              | BxSdoA         |
| BxSdoA-r   | GTGGTGGTGCCTCGAGAAGCGCAT                         |                |
| PpSdoA-f   | <u>TAAGAAGGAGATATACAT</u> ATGATCATCGGCAACAACCTT  | PpSdoA         |
| PpSdoA-r   | GTGGTGGTGCCTCGAGCAGCTTGTTTCAGCGGGATCT            |                |
| PaSdoA-f   | <u>TAAGAAGGAGATATACAT</u> ATGTTGAAACCCGACATCAC   | PaSdoA         |
| PaSdoA-r   | GTGGTGGTGCCTCGAGGAACAGATCCAGCGG                  |                |
| CnETHE1-f  | <u>TAAGAAGGAGATATACAT</u> ATGCAAACCTTCTATCAGCT   | CnETHE1        |
| CnETHE1-r  | GTGGTGGTGCCTCGAGGGCGCCATGCGGCACGCTTT             |                |
| MxETHE1a-f | <u>AGAAGGAGATATACAT</u> ATGCTCTTCCGCCAGCTCT      | MxETHE1a       |
| MxETHE1a-r | GTGGTGGTGCCTCGAGATGTGTGAAGCTGCCT                 |                |
| EcGloB1-f  | <u>TAAGAAGGAGATATACAT</u> ATGAATCTTAACAGTATTCCCG | EcGloB1        |
| EcGloB1-r  | GGTGGTGGTGCCTCGAGGAACCTATCTTTCTTTGACC            |                |
| HiGloB1-f  | <u>TAAGAAGGAGATATACAT</u> ATGTTATTTGCTTTACCT     | HiGloB1        |
| HiGloB1-r  | GTGGTGGTGCCTCGAGGAACATATCTTTTGCTTTGC             |                |
| EcGloB2-f  | <u>TAAGAAGGAGATATACAT</u> ATGAACTATCGTATTATT     | EcGloB2        |
| EcGloB2-r  | GTGGTGGTGCCTCGAGCCAGACGGGCATTTCGTCTT             |                |
| PaGloB2-f  | <u>TAAGAAGGAGATATACAT</u> ATGTCGACATCCCCCGCGCT   | PaGloB2        |
| PaGloB2-r  | GTGGTGGTGCCTCGAGGCCCTGACGAAGGGGTTC               |                |

14 <sup>a</sup>Underlined sequences indicate overlap sequences with pET30 Ec/Lic.

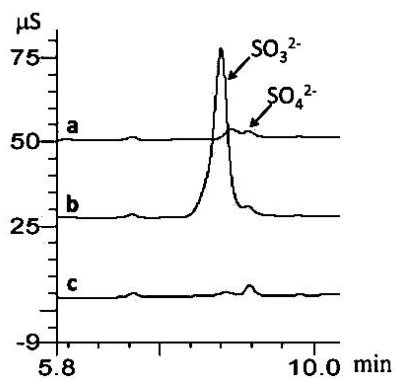

15

16 **Fig. S1 Ion chromatography analysis of the product from GSSH oxidation by**  
 17 **CnSdoA.** The reactions were carried out in typical reaction mixtures with 1 mM  
 18 GSSH and (a) heat-inactivated CnSdoA, (b) CnSdoA, or (c) control without CnSdoA.

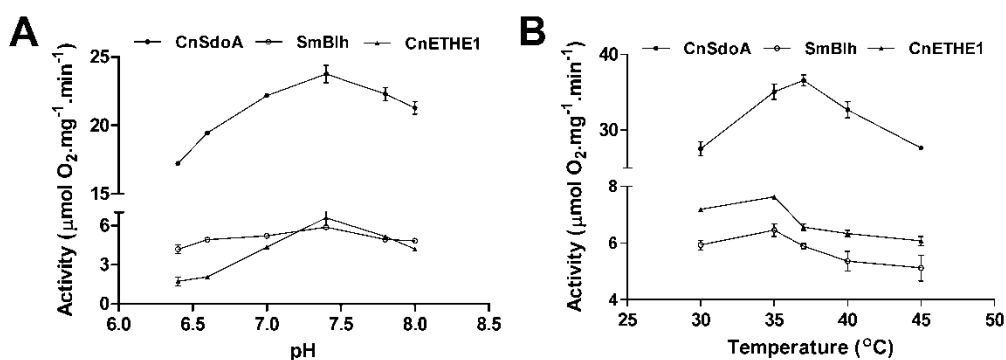

19

20 **Fig. S2 Optimal of pH and temperature of SDOs.** The SDO activities were  
 21 determined at various pH values within the range of 6.4 to 7.8 in 100 mM KPi buffers  
 22 at 25 °C (A) and at different temperatures range of 25 °C to 45 °C at pH 7.4 (B).
